# Supplementary material for: Enhanced performance of a n-Si/p-GaTe heterojunction through interfacial passivation and thermal oxidation
Source: Royal Society of Chemistry journal article supplement (doi:10.1039/d2tc02740b), 2022-01-01
Supplement: d2tc02740b1.pdf [file d2tc02740b1.pdf]

---

Supplementary

**Enhanced performance of a n-Si/p-GaTe heterojunction through interfacial passivation and thermal oxidation**

Yali Liu<sup>1</sup>, Xiaoxiang Wu<sup>1</sup>, Wenxuan Guo<sup>1</sup>, Mengge Li<sup>1</sup>, Cong Xiao<sup>1</sup>, Tianjian Ou<sup>1</sup>, Jiadong Yao<sup>1</sup>, Ying Yu<sup>1</sup>, Yuan Zheng<sup>1</sup>, Yewu Wang<sup>1,2\*</sup>

<sup>1</sup>*Department of Physics, Zhejiang Province Key Laboratory of Quantum Technology and Device & State Key Laboratory of Silicon Materials, Zhejiang University, Hangzhou 310027, P. R. China.*

<sup>2</sup>*Collaborative Innovation Centre of Advanced Microstructures, Nanjing University, Nanjing 210093, P. R. China*

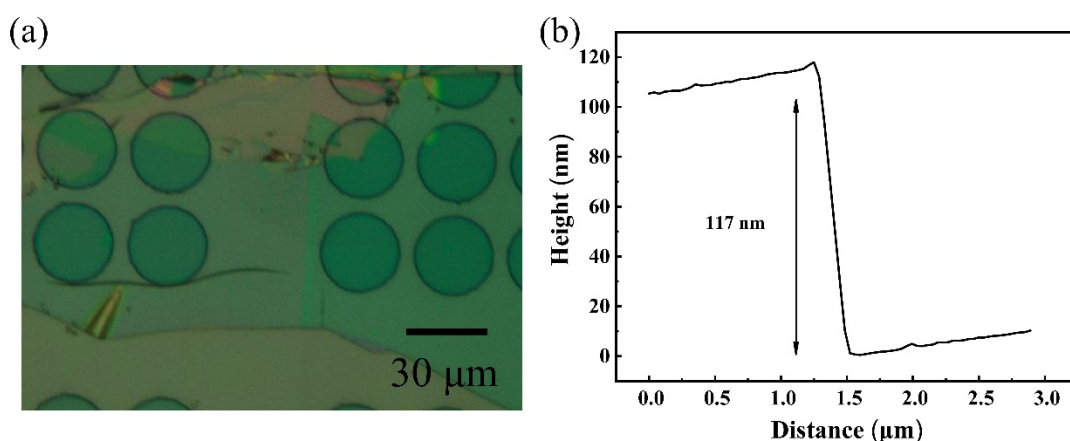

**Figure S1.** (a) The optical image of n-Si/p-GaTe heterojunction with and without AlO<sub>x</sub> passivation layer. (b) Thickness of GaTe flake used in the n-Si/p-GaTe heterojunction.

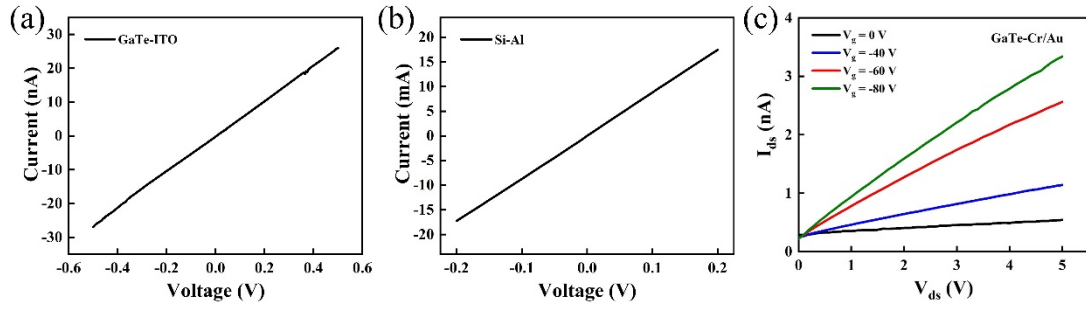

**Figure S2.** (a)  $I$ - $V$  curve of GaTe-ITO with Ohmic contact. (b)  $I$ - $V$  curve of Si-Al with Ohmic contact. (c) Output curves of GaTe FET with Cr/Au electrodes at various  $V_g$ .

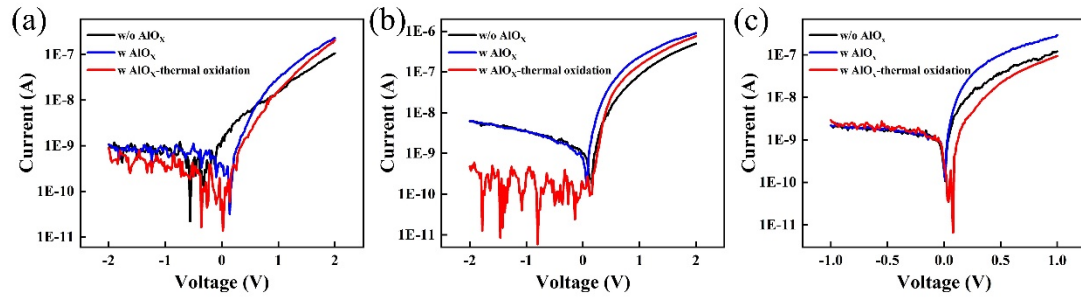

**Figure S3.**  $I$ - $V$  curves of other three n-Si/p-GaTe heterojunctions without  $\text{AlO}_x$  passivation, with  $\text{AlO}_x$  passivation and with  $\text{AlO}_x$  passivation-thermal oxidation under dark condition.

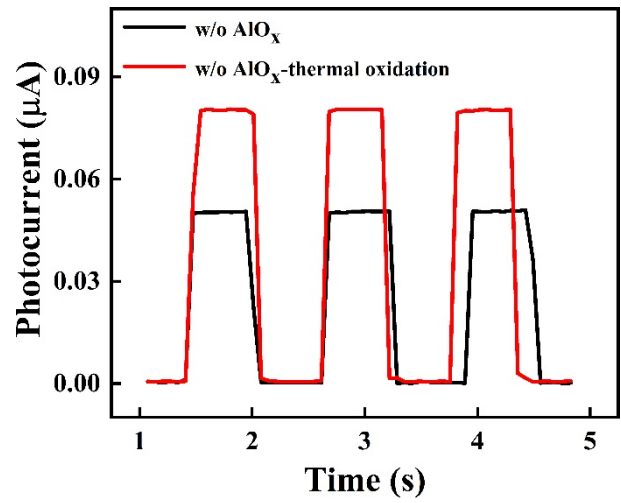

**Figure S4.** Time-dependent photoresponse of n-Si/p-GaTe heterojunction without  $\text{AlO}_x$  passivation layer before and after heat treatment.

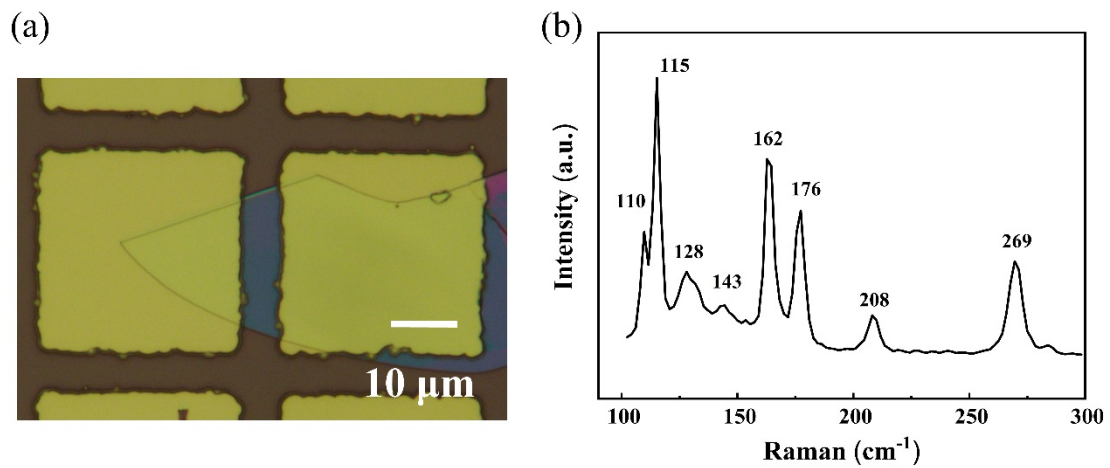

**Figure S5.** (a) The optical image of GaTe FET. (b) Raman spectroscopy of GaTe channel of the FET.

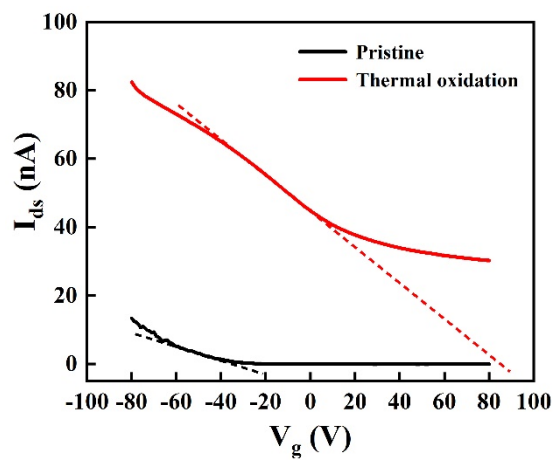

**Figure S6.** Transfer curves of GaTe FET before and after thermal oxidation.
